# Supplementary material for: Association of meteorological factors and ambient air pollution on medical care utilization for urolithiasis: a population-based time-series study
Source: Springer Nature journal article supplement (doi:10.1186/s12882-021-02614-5), 2021-12-01
Supplement: MOESM1 [file 19924328]

## Supplementary Information

### Effect of meteorological factors and ambient air pollution on urolithiasis: a population-based time-series study

#### Content

##### Supplementary Table 1

Summary of the daily incidence of urolithiasis and data on meteorological factors and ambient air pollutants in Korea between 2002 and 2017

##### Supplementary Table 2

Summary statistics for random sampling of urolithiasis cases with corresponding data on meteorological factors and ambient air pollutants in Korea between 2002 and 2017

##### Supplementary Table 3

Comparison of urolithiasis incidence rates among different age groups between 2002 and 2017

**Supplementary Table 4.** Akaike information criterion for the association between daily medical care utilization for urolithiasis and selected meteorological factors and ambient air pollutants (MFAPs)

##### Supplementary Figure 1

Prevalence and incidence of (a) ureteral and (b) renal stones between 2002 and 2017. (c) Histogram of the sex-dependent incidence of urolithiasis according to age group.

##### Supplementary Figure 2

Generalized additive model with natural splines for the effect of selected MFAPs on the number of medical care utilization for urolithiasis. Ureteral stones: (a) average temperature, (b) PM<sub>2.5</sub>, and (c) CO. Renal stones: (d) average temperature, (e) PM<sub>2.5</sub>, and (f) CO. The bold line indicates the relative effect sizes for urolithiasis, and the blue area indicates 95% confidence intervals. The X- and Y-axes represent the selected MFAPs and relative effect sizes for urolithiasis, respectively. MFAPs, meteorological factors and ambient air pollutants; PM<sub>2.5</sub>, particulate matter  $\leq 2.5$   $\mu\text{m}$ ; CO, carbon monoxide.

## Supplementary Table 1

Summary of the daily incidence of urolithiasis and data on meteorological factors and ambient air pollutants in Korea between 2002 and 2017

|                                      | 2002      | 2003      | 2004      | 2005      | 2006      | 2007      | 2008      | 2009      | 2010      | 2011      | 2012      | 2013      | 2014      | 2015      | 2016      | 2017      |         |
|--------------------------------------|-----------|-----------|-----------|-----------|-----------|-----------|-----------|-----------|-----------|-----------|-----------|-----------|-----------|-----------|-----------|-----------|---------|
| <b>Urolithiasis (N = 3,036,223)</b>  | 171,956   | 172,797   | 174,288   | 181,911   | 183,137   | 195,070   | 194,670   | 196,933   | 193,521   | 194,440   | 198,574   | 198,705   | 191,282   | 194,439   | 195,998   | 198,511   |         |
| <b>Incidence</b>                     |           |           |           |           |           |           |           |           |           |           |           |           |           |           |           |           |         |
| Ureteral Stone (n = 2,546,196)       | 142,983   | 143,410   | 144,748   | 152,237   | 153,120   | 162,972   | 163,117   | 165,286   | 164,120   | 163,422   | 166,995   | 167,894   | 161,117   | 163,542   | 164,743   | 166,490   |         |
| Renal Stone (n = 490,027)            | 28,973    | 29,378    | 29,540    | 29,674    | 30,017    | 32,098    | 31,553    | 31,647    | 29,401    | 31,018    | 31,579    | 30,811    | 30,165    | 30,897    | 31,255    | 32,021    |         |
| <b>Gender</b>                        |           |           |           |           |           |           |           |           |           |           |           |           |           |           |           |           |         |
| Ureteral Stone                       |           |           |           |           |           |           |           |           |           |           |           |           |           |           |           |           |         |
| Male                                 | 91,396    | 91,536    | 94,419    | 100,165   | 105,669   | 107,544   | 107,899   | 110,377   | 108,966   | 109,109   | 111,994   | 113,192   | 109,411   | 110,658   | 111,477   | 112,577   |         |
| Female                               | 51,587    | 51,874    | 50,329    | 52,072    | 52,451    | 55,428    | 55,218    | 54,909    | 55,154    | 54,313    | 55,001    | 54,702    | 51,706    | 52,884    | 53,266    | 53,913    |         |
| Renal Stone                          |           |           |           |           |           |           |           |           |           |           |           |           |           |           |           |           |         |
| Male                                 | 17,152    | 17,047    | 17,631    | 17,797    | 18,005    | 19,098    | 18,910    | 19,171    | 17,908    | 18,757    | 19,074    | 18,607    | 18,241    | 18,748    | 18,696    | 18,950    |         |
| Female                               | 11,821    | 12,331    | 11,909    | 11,877    | 12,012    | 13,000    | 12,643    | 12,476    | 11,493    | 12,261    | 12,505    | 12,204    | 11,924    | 12,149    | 12,559    | 13,071    |         |
| <b>Age, Year</b>                     |           |           |           |           |           |           |           |           |           |           |           |           |           |           |           |           |         |
| Ureteral Stone                       | < 20      | 4,238     | 3,962     | 3,811     | 3,781     | 3,790     | 3,970     | 3,905     | 3,670     | 3,719     | 3,470     | 2,962     | 3,176     | 2,838     | 2,320     | 2,422     | 2,669   |
|                                      | 20 - 60   | 117,089   | 116,738   | 117,771   | 123,396   | 122,428   | 126,069   | 125,232   | 125,184   | 122,214   | 121,148   | 120,437   | 120,088   | 112,205   | 112,479   | 110,609   | 109,472 |
|                                      | > 60      | 21,656    | 22,710    | 23,166    | 25,060    | 26,902    | 32,933    | 33,980    | 36,432    | 38,187    | 38,804    | 43,596    | 44,630    | 46,074    | 48,743    | 51,712    | 54,349  |
| Renal Stone                          | < 20      | 876       | 880       | 893       | 832       | 849       | 899       | 857       | 899       | 824       | 894       | 897       | 841       | 822       | 758       | 848       | 844     |
|                                      | 20 - 60   | 22,426    | 22,786    | 23,023    | 23,342    | 23,669    | 25,993    | 25,441    | 25,436    | 23,502    | 24,792    | 25,407    | 24,919    | 23,918    | 24,811    | 24,610    | 25,027  |
|                                      | > 60      | 5,671     | 5,712     | 5,624     | 5,500     | 5,499     | 5,206     | 5,255     | 5,312     | 5,075     | 5,332     | 5,275     | 5,051     | 5,425     | 5,328     | 5,797     | 6,150   |
| <b>Meteorology (Mean, SD)</b>        |           |           |           |           |           |           |           |           |           |           |           |           |           |           |           |           |         |
| Average Temperature (°C)             | 12.3(9.6) | 14.1(8.8) | 14.4(9.4) | 13(10.3)  | 14.1(9.3) | 14.9(9.0) | 13.9(9.6) | 13.9(9.4) | 13.4(9.6) | 12.8(9.4) | 12.9(9.8) | 13.6(9.6) | 14.1(9.6) | 14.0(9.4) | 14.3(9.2) | 14.0(9.3) |         |
| High Temperature (°C)                | 16.7(9.9) | 18.5(9.0) | 19.1(9.5) | 17(10.4)  | 18.5(9.5) | 19.1(8.9) | 18.4(9.8) | 18.4(9.6) | 17.8(9.7) | 17.2(9.5) | 17.4(9.9) | 18.1(9.7) | 18.9(9.7) | 18.9(9.6) | 19.0(9.3) | 18.8(9.3) |         |
| Low Temperature (°C)                 | 8.5(9.7)  | 10.3(9.1) | 10.4(9.6) | 9.6(10.5) | 10.4(9.5) | 11.3(9.3) | 10.1(9.7) | 10.1(9.5) | 9.8(10.9) | 9.2(10.6) | 9.1(11.0) | 9.8(9.9)  | 10.2(9.9) | 10.0(9.5) | 10.3(9.4) | 9.9(9.6)  |         |
| Daily Range (°C)                     | 8.2(3.0)  | 8.1(3.0)  | 8.7(3.1)  | 8.3(2.8)  | 8.1(2.9)  | 7.8(2.9)  | 8.3(2.9)  | 8.3(3.0)  | 7.9(2.9)  | 8.0(3.0)  | 8.3(2.7)  | 8.2(3.1)  | 8.6(3.1)  | 8.8(3.2)  | 8.7(2.9)  | 8.8(3.0)  |         |
| Vapor Pressure (hPa)                 | 11.1(7.7) | 12.6(7.6) | 12.5(8.1) | 12.1(8.6) | 12.3(7.9) | 13.2(8.3) | 11.9(7.8) | 11.7(7.4) | 12.5(8.9) | 11.4(8.3) | 11.3(8.3) | 12.3(8.8) | 12.9(8.4) | 12.3(7.8) | 12.9(8.8) | 12.3(8.9) |         |
| Solar Radiation (MJ/m <sup>2</sup> ) | 12.5(6.8) | 12.1(6.7) | 13.1(6.9) | 13.4(7.1) | 12.8(6.8) | 12.5(6.8) | 13.5(6.8) | 13.8(7.1) | 12.9(6.7) | 13.1(6.9) | 12.8(6.4) | 13.0(6.8) | 12.9(6.3) | 13.1(6.6) | 13.2(6.4) | 13.7(6.9) |         |

|                                        |           |           |           |           |           |           |           |           |           |           |           |           |           |           |           |           |
|----------------------------------------|-----------|-----------|-----------|-----------|-----------|-----------|-----------|-----------|-----------|-----------|-----------|-----------|-----------|-----------|-----------|-----------|
| Sunshine Duration (hr)                 | 12.0(1.7) | 12.3(1.7) | 12.2(1.7) | 12.2(1.7) | 12.2(1.7) | 12.2(1.7) | 12.2(1.7) | 12.2(1.7) | 12.2(1.7) | 12.1(1.7) | 12.2(1.7) | 12.2(1.7) | 12.2(1.7) | 12.1(1.7) | 12.2(1.7) | 12.2(1.7) |
| Wind Speed (m/s)                       | 2.4(1.2)  | 2.1(0.9)  | 2.3(0.9)  | 2.5(1.0)  | 2.3(1.0)  | 2.4(1.0)  | 2.4(0.9)  | 2.5(1.0)  | 2.5(1.0)  | 2.6(1.0)  | 2.7(1.0)  | 2.7(1.1)  | 2.5(1.0)  | 2.6(1.0)  | 2.4(1.0)  | 2.3(0.9)  |
| Daily Rain (mm)                        | 10(24.2)  | 14(26.7)  | 10(18.7)  | 9.8(20.2) | 9.4(23.7) | 7.9(14.0) | 8.8(18.8) | 13(31.5)  | 10(19.9)  | 12.8(31)  | 10.8(21)  | 9.5(18.1) | 8.3(16.7) | 6.1(10.6) | 7.9(16.9) | 6.2(16.3) |
| Dew Point Temperature (°C)             | 4.8(11.3) | 7.3(10.6) | 6.6(11.3) | 5.4(12.6) | 6.5(11.2) | 7.7(10.7) | 5.9(11.6) | 5.8(11.2) | 6.1(12.2) | 4.6(12.5) | 4.4(12.5) | 5.8(12.1) | 7.1(11.7) | 6.8(10.6) | 6.8(12.0) | 5.8(12.3) |
| Humidity (%)                           | 63(15.5)  | 65(15.3)  | 62(15.4)  | 61(15.9)  | 62(15.4)  | 64(14.6)  | 61(15.2)  | 61(15.8)  | 64(15.6)  | 60(16.9)  | 59(16.1)  | 62(16.1)  | 65(16.9)  | 65(16.2)  | 64(16.4)  | 61(16.1)  |
| Daily snow (cm)                        | 1.4(1.5)  | 2.1(2.2)  | 3.8(5.4)  | 3.5(6.4)  | 3.9(3.1)  | 1.4(2.6)  | 3.7(3.0)  | 2.4(2.2)  | 8.2(6.8)  | 2.7(2.1)  | 3.6(2.9)  | 5.5(4.3)  | 2.1(1.8)  | 2.4(2.5)  | 1.9(2.9)  | 1.9(1.6)  |
| Cloud (1/10)                           | 4.8(3.3)  | 5.4(3.2)  | 4.5(3.1)  | 4.5(3.2)  | 5.1(3.0)  | 5.2(3.1)  | 4.7(3.0)  | 4.6(3.1)  | 5.1(3.2)  | 5.0(3.3)  | 4.9(3.0)  | 4.8(3.1)  | 4.8(3.1)  | 4.8(3.1)  | 4.8(2.9)  | 4.6(3.0)  |
|                                        |           |           |           |           |           |           |           |           |           |           |           |           |           |           |           |           |
| <b>Air Pollutants (Mean, SD)</b>       |           |           |           |           |           |           |           |           |           |           |           |           |           |           |           |           |
| PM <sub>2.5</sub> (ug/m <sup>3</sup> ) | -         | -         | -         | -         | -         | -         | -         | -         | -         | -         | 28(12)    | 27(13)    | 25(14)    | 24(12)    | 25(14)    | 23(12)    |
| PM <sub>10</sub> (ug/m <sup>3</sup> )  | 72(82)    | 62(34)    | 59(27)    | 58(27)    | 57(36)    | 57(31)    | 56(30)    | 54(29)    | 50(28)    | 49(30)    | 45(21)    | 47(23)    | 48(26)    | 47(34)    | 46(19)    | 45(20)    |
| O <sub>3</sub> (100ppb)                | 1.5(0.8)  | 1.6(0.8)  | 1.7(0.9)  | 1.8(0.9)  | 1.8(0.9)  | 1.8(0.9)  | 1.9(0.9)  | 2.1(1.0)  | 1.9(0.9)  | 1.9(1.0)  | 2.1(1.0)  | 2.2(1.0)  | 2.3(1.1)  | 2.2(1.0)  | 2.4(1.1)  | 2.5(1.1)  |
| NO <sub>2</sub> (100ppb)               | 3.3(1.1)  | 3.3(1.3)  | 3.2(1.2)  | 3.1(1.2)  | 3.2(1.2)  | 3.3(1.4)  | 3.4(1.4)  | 3.3(1.3)  | 3.2(1.3)  | 3.2(1.3)  | 3.1(1.2)  | 3.2(1.3)  | 3.1(1.3)  | 3.1(1.3)  | 2.9(1.1)  | 2.8(1.1)  |
| SO <sub>2</sub> (100ppb)               | 0.5(0.2)  | 0.5(0.2)  | 0.5(0.2)  | 0.5(0.2)  | 0.5(0.2)  | 0.6(0.3)  | 0.6(0.2)  | 0.5(0.2)  | 0.5(0.2)  | 0.5(0.2)  | 0.5(0.2)  | 0.5(0.2)  | 0.5(0.2)  | 0.5(0.2)  | 0.5(0.1)  | 0.4(0.1)  |
| CO (10ppm)                             | 0.7(0.2)  | 0.6(0.2)  | 0.6(0.2)  | 0.6(0.2)  | 0.6(0.2)  | 0.6(0.3)  | 0.6(0.2)  | 0.6(0.2)  | 0.5(0.2)  | 0.5(0.2)  | 0.5(0.2)  | 0.5(0.2)  | 0.5(0.1)  | 0.5(0.1)  | 0.5(0.1)  | 0.4(0.1)  |

O<sub>3</sub> was analyzed based on 8-hour maximum levels per time or day. SD, standard deviation; min, minimum; max, maximum; ppb, parts per billion; ppm, parts per million

**Supplementary Table 2**

Summary statistics for random sampling of urolithiasis cases with corresponding data on meteorological factors and ambient air pollutants in Korea between 2002 and 2017

|                                   | 2002      | 2003      | 2004      | 2005     | 2006      | 2007      | 2008      | 2009      | 2010       | 2011       | 2012       | 2013       | 2014      | 2015      | 2016       | 2017       |       |
|-----------------------------------|-----------|-----------|-----------|----------|-----------|-----------|-----------|-----------|------------|------------|------------|------------|-----------|-----------|------------|------------|-------|
| <b>Urolithiasis (N = 300,000)</b> | 16,306    | 17,922    | 18,913    | 19,323   | 19,181    | 17,938    | 17,692    | 17,815    | 17,438     | 18,222     | 20,875     | 20,407     | 18,987    | 19,252    | 19,848     | 19,881     |       |
| <b>Incidence</b>                  |           |           |           |          |           |           |           |           |            |            |            |            |           |           |            |            |       |
| Ureteral Stone (n = 150,000)      | 6,646     | 7,393     | 7,985     | 8,400    | 8,620     | 9,551     | 9,615     | 9,603     | 9,557      | 9,571      | 10,895     | 10,853     | 10,122    | 10,183    | 10,535     | 10,471     |       |
| Renal Stone (n = 150,000)         | 9,660     | 10,529    | 10,928    | 10,923   | 10,561    | 8,387     | 8,077     | 8,212     | 7,881      | 8,651      | 9,980      | 9,554      | 8,865     | 9,069     | 9,313      | 9,410      |       |
| <b>Gender</b>                     |           |           |           |          |           |           |           |           |            |            |            |            |           |           |            |            |       |
| Ureteral Stone                    |           |           |           |          |           |           |           |           |            |            |            |            |           |           |            |            |       |
| Male                              | 3,996     | 4,430     | 4,847     | 5,223    | 5,267     | 5,909     | 5,878     | 6,033     | 5,899      | 5,877      | 6,809      | 6,741      | 6,365     | 6,327     | 6,582      | 6,634      |       |
| Female                            | 2,650     | 2,963     | 3,138     | 3,177    | 3,353     | 3,642     | 3,737     | 3,570     | 3,658      | 3,694      | 4,086      | 4,112      | 3,757     | 3,856     | 3,953      | 3,837      |       |
| Renal Stone                       |           |           |           |          |           |           |           |           |            |            |            |            |           |           |            |            |       |
| Male                              | 5,665     | 6,120     | 6,547     | 6,521    | 6,339     | 5,001     | 4,848     | 4,965     | 4,834      | 5,262      | 6,060      | 5,754      | 5,385     | 5,455     | 5,560      | 5,628      |       |
| Female                            | 3,995     | 4,409     | 4,381     | 4,402    | 4,222     | 3,386     | 3,229     | 3,247     | 3,047      | 3,389      | 3,920      | 3,800      | 3,480     | 3,614     | 3,753      | 3,782      |       |
| <b>Age, Year</b>                  |           |           |           |          |           |           |           |           |            |            |            |            |           |           |            |            |       |
| Ureteral Stone                    | < 20      | 290       | 307       | 306      | 310       | 317       | 369       | 343       | 338        | 349        | 326        | 312        | 357       | 337       | 272        | 326        | 275   |
|                                   | 20 - 60   | 5,452     | 6,040     | 6,574    | 6,925     | 7,013     | 7,577     | 7,580     | 7,500      | 7,434      | 7,421      | 8,263      | 8,252     | 7,510     | 7,574      | 7,601      | 7,486 |
|                                   | 60 <      | 904       | 1,046     | 1,105    | 1,165     | 1,290     | 1,605     | 1,692     | 1,765      | 1,774      | 1,824      | 2,320      | 2,244     | 2,275     | 2,337      | 2,608      | 2,710 |
| Renal Stone                       | < 20      | 323       | 352       | 338      | 332       | 336       | 222       | 204       | 162        | 202        | 190        | 236        | 184       | 173       | 150        | 145        | 152   |
|                                   | 20 - 60   | 7,587     | 8,353     | 8,642    | 8,686     | 8,290     | 6,433     | 6,177     | 6,167      | 5,835      | 6,282      | 7,092      | 6,752     | 6,198     | 6,142      | 6,224      | 6,171 |
|                                   | 60 <      | 1,750     | 1,824     | 1,948    | 1,905     | 1,935     | 1,732     | 1,696     | 1,883      | 1,844      | 2,179      | 2,652      | 2,618     | 2,494     | 2,777      | 2,944      | 3,087 |
| <b>Meteorology (Mean, SD)</b>     |           |           |           |          |           |           |           |           |            |            |            |            |           |           |            |            |       |
| Average Temperature (°C)          | 13.6(9.4) | 14.0(8.8) | 14.6(9.3) | 14(10.3) | 14.4(9.3) | 14.9(9.0) | 14.3(9.6) | 14.0(9.5) | 13.8(10.4) | 13.4(10.3) | 13.9(10.9) | 14.4(10.6) | 14.4(9.4) | 14.6(9.4) | 14.7(10.3) | 14.2(10.4) |       |
| High Temperature (°C)             | 18.1(9.7) | 18.4(9.0) | 19.4(9.4) | 18(10.4) | 18.8(9.5) | 19.2(9.0) | 18.8(9.7) | 18.6(9.7) | 18.2(10.5) | 17.8(10.3) | 18.4(11.0) | 18.9(10.7) | 19.1(9.5) | 19.4(9.6) | 19.4(10.4) | 19.1(10.3) |       |
| Low Temperature (°C)              | 9.7(9.5)  | 10.3(9.1) | 10.6(9.5) | 10(10.6) | 10.6(9.6) | 11.3(9.3) | 10.5(9.7) | 10.2(9.6) | 10.2(10.7) | 9.7(10.5)  | 10.1(11.1) | 10.6(10.9) | 10.4(9.8) | 10.6(9.5) | 10.7(10.5) | 10.0(10.7) |       |
| Daily Range (°C)                  | 8.4(3.1)  | 8.1(3.0)  | 8.7(3.0)  | 8.4(2.8) | 8.1(2.9)  | 7.8(2.9)  | 8.3(2.9)  | 8.3(3.0)  | 8.0(3.0)   | 8.0(3.1)   | 8.2(2.8)   | 8.2(3.1)   | 8.7(3.2)  | 8.8(3.2)  | 8.7(2.9)   | 8.8(3.0)   |       |

|                                        |           |           |           |           |           |           |           |           |           |           |           |            |           |           |           |           |        |
|----------------------------------------|-----------|-----------|-----------|-----------|-----------|-----------|-----------|-----------|-----------|-----------|-----------|------------|-----------|-----------|-----------|-----------|--------|
| Vapor Pressure (hPa)                   | 12.0(7.9) | 12.6(7.6) | 12.6(8.1) | 12.5(8.7) | 12.6(8.1) | 13.1(8.4) | 12.2(8.0) | 11.7(7.4) | 12.7(8.9) | 11.9(8.3) | 12.2(8.5) | 12.3(8.8)  | 13.0(8.2) | 12.3(7.8) | 12.9(8.8) | 12.3(8.9) |        |
| Solar Radiation (MJ/m <sup>2</sup> )   | 13.1(6.8) | 12.0(6.7) | 13.2(6.9) | 13.6(7.0) | 12.8(6.8) | 12.8(6.7) | 13.7(6.7) | 13.9(7.1) | 13.1(6.7) | 13.2(6.9) | 13.2(6.5) | 13.0(6.8)  | 13.3(6.5) | 13.1(6.6) | 13.2(6.4) | 13.7(6.9) |        |
| Sunshine Duration (hr)                 | 12.1(1.7) | 12.2(1.7) | 12.2(1.7) | 12.3(1.7) | 12.2(1.7) | 12.3(1.7) | 12.2(1.7) | 12.2(1.7) | 12.2(1.7) | 12.2(1.7) | 12.3(1.7) | 12.2(1.7)  | 12.2(1.7) | 12.1(1.7) | 12.2(1.7) | 12.2(1.7) |        |
| Wind Speed (m/s)                       | 2.5(1.2)  | 2.2(1.0)  | 2.4(0.9)  | 2.5(1.0)  | 2.4(1.0)  | 2.4(1.0)  | 2.4(0.9)  | 2.5(1.0)  | 2.5(1.0)  | 2.6(1.0)  | 2.7(1.0)  | 2.7(1.1)   | 2.5(1.0)  | 2.6(1.0)  | 2.4(1.0)  | 2.3(0.9)  |        |
| Daily Rain (mm)                        | 9.8(22.2) | 12(24.6)  | 10(19.5)  | 9.6(19.2) | 10(25.5)  | 7.9(14.2) | 9.2(19.6) | 11(26.1)  | 10(19.4)  | 13.1(32)  | 10.8(21)  | 10.2(20.3) | 8.7(18.3) | 6.1(10.6) | 7.9(16.9) | 6.2(16.3) |        |
| Dew Point Temperature (°C)             | 6.1(11.1) | 7.3(10.5) | 6.7(11.4) | 5.9(12.7) | 6.8(11.2) | 7.6(10.8) | 6.3(11.6) | 5.9(11.3) | 6.5(12.2) | 5.2(12.4) | 4.4(12.5) | 6.6(12.1)  | 7.1(11.7) | 6.8(10.6) | 6.8(12.0) | 5.8(12.3) |        |
| Humidity (%)                           | 63(15.5)  | 66(15.1)  | 62(15.7)  | 61(15.9)  | 62(15.3)  | 64(15.0)  | 61(15.5)  | 61(15.9)  | 64(15.7)  | 61(17.2)  | 59(16.1)  | 63(16.1)   | 65(16.9)  | 65(16.2)  | 64(16.4)  | 61(16.1)  |        |
| Daily snow (cm)                        | 1.4(1.5)  | 2.2(2.6)  | 4.6(6.2)  | 3.0(4.9)  | 3.6(2.6)  | 1.8(3.9)  | 3.8(3.9)  | 2.4(2.4)  | 7.6(6.3)  | 2.7(2.0)  | 3.9(3.1)  | 5.9(4.3)   | 2.0(1.8)  | 2.4(2.5)  | 1.9(2.9)  | 1.9(1.6)  |        |
| Cloud (1/10)                           | 4.7(3.3)  | 5.3(3.2)  | 4.5(3.1)  | 4.5(3.2)  | 4.9(3.0)  | 5.2(3.1)  | 4.7(3.0)  | 4.6(3.1)  | 5.1(3.2)  | 5.0(3.3)  | 5.0(3.0)  | 4.8(3.1)   | 4.8(3.1)  | 4.8(3.1)  | 4.8(2.9)  | 4.6(3.0)  |        |
|                                        |           |           |           |           |           |           |           |           |           |           |           |            |           |           |           |           |        |
| <b>Air Pollutants (Mean, SD)</b>       |           |           |           |           |           |           |           |           |           |           |           |            |           |           |           |           |        |
| PM <sub>2.5</sub> (ug/m <sup>3</sup> ) | -         | -         | -         | -         | -         | -         | -         | -         | -         | -         | -         | 28(12)     | 27(14)    | 25(14)    | 24(12)    | 25(14)    | 23(12) |
| PM <sub>10</sub> (ug/m <sup>3</sup> )  | 69(66)    | 60(32)    | 58(26)    | 58(27)    | 58(42)    | 58(36)    | 55(32)    | 52(28)    | 50(28)    | 49(31)    | 44(20)    | 47(23)     | 48(26)    | 47(34)    | 46(19)    | 45(20)    |        |
| O <sub>3</sub> (100ppb)                | 1.6(0.8)  | 1.7(0.9)  | 1.7(0.9)  | 1.9(0.9)  | 1.8(0.9)  | 1.8(0.9)  | 2.0(0.9)  | 2.1(1.0)  | 1.9(0.9)  | 2.0(1.0)  | 2.1(1.0)  | 2.2(1.0)   | 2.3(1.1)  | 2.2(1.0)  | 2.4(1.1)  | 2.5(1.1)  |        |
| NO <sub>2</sub> (100ppb)               | 3.2(1.1)  | 3.1(1.3)  | 3.2(1.2)  | 2.9(1.2)  | 3.0(1.2)  | 3.2(1.3)  | 3.2(1.4)  | 3.1(1.3)  | 3.2(1.3)  | 3.1(1.3)  | 3.1(1.2)  | 3.2(1.3)   | 3.1(1.3)  | 3.1(1.3)  | 2.9(1.1)  | 2.8(1.1)  |        |
| SO <sub>2</sub> (100ppb)               | 0.5(0.2)  | 0.5(0.2)  | 0.6(0.2)  | 0.5(0.2)  | 0.5(0.2)  | 0.6(0.3)  | 0.6(0.2)  | 0.5(0.2)  | 0.5(0.2)  | 0.5(0.2)  | 0.5(0.2)  | 0.5(0.2)   | 0.5(0.2)  | 0.5(0.1)  | 0.4(0.1)  | 0.4(0.1)  |        |
| CO (10ppm)                             | 0.7(0.2)  | 0.6(0.2)  | 0.6(0.2)  | 0.6(0.2)  | 0.6(0.2)  | 0.6(0.2)  | 0.6(0.2)  | 0.6(0.2)  | 0.5(0.2)  | 0.5(0.2)  | 0.5(0.2)  | 0.5(0.2)   | 0.5(0.1)  | 0.5(0.1)  | 0.5(0.1)  | 0.4(0.1)  |        |

O<sub>3</sub> was analyzed based on 8-hour maximum levels per time or day.

SD, standard deviation; min, minimum; max, maximum; ppb, parts per billion; ppm, parts per million

**Supplementary Table 3**

Comparison of urolithiasis incidence rates among different age groups between 2002 and 2017

| Age Group | Male                                 |                   |                                        | Female                               |                   |                                        |
|-----------|--------------------------------------|-------------------|----------------------------------------|--------------------------------------|-------------------|----------------------------------------|
|           | Observation period<br>(person-years) | No. of occurrence | Incidence rate<br>(/1,000 person-year) | Observation period<br>(person-years) | No. of occurrence | Incidence rate<br>(/1,000 person-year) |
| 0         | 225,242                              | 68                | 0.30                                   | 212,210                              | 32                | 0.15                                   |
| 1-4       | 916,978                              | 1,162             | 1.27                                   | 864,654                              | 436               | 0.50                                   |
| 5-9       | 1,243,294                            | 2,391             | 1.92                                   | 1,151,369                            | 1,280             | 1.11                                   |
| 10-14     | 1,654,964                            | 6,892             | 4.16                                   | 1,518,262                            | 3,572             | 2.35                                   |
| 15-19     | 1,826,179                            | 30,296            | 16.59                                  | 1,612,235                            | 16,158            | 10.02                                  |
| 20-24     | 1,625,371                            | 64,327            | 39.58                                  | 1,430,049                            | 31,433            | 21.98                                  |
| 25-29     | 1,802,805                            | 138,573           | 76.86                                  | 1,736,144                            | 43,160            | 24.86                                  |
| 30-34     | 1,866,397                            | 204,831           | 109.75                                 | 1,828,951                            | 53,789            | 29.41                                  |
| 35-39     | 2,060,233                            | 241,193           | 117.07                                 | 2,038,914                            | 67,327            | 33.02                                  |
| 40-44     | 2,071,431                            | 252,247           | 121.78                                 | 2,059,992                            | 84,416            | 40.98                                  |
| 45-49     | 2,044,641                            | 252,208           | 123.35                                 | 2,028,717                            | 102,716           | 50.63                                  |
| 50-54     | 1,887,973                            | 243,702           | 129.08                                 | 1,910,158                            | 123,204           | 64.50                                  |
| 55-59     | 1,360,747                            | 216,987           | 159.46                                 | 1,405,948                            | 119,970           | 85.33                                  |
| 60-64     | 1,057,035                            | 173,444           | 164.08                                 | 1,125,201                            | 91,754            | 81.54                                  |
| 65-69     | 833,242                              | 132,316           | 158.80                                 | 978,926                              | 69,451            | 70.95                                  |
| 70-74     | 672,894                              | 90,280            | 134.17                                 | 893,120                              | 47,549            | 53.24                                  |
| 75-79     | 410,726                              | 50,129            | 122.05                                 | 673,641                              | 28,188            | 41.84                                  |
| 80-84     | 186,008                              | 22,411            | 120.48                                 | 409,501                              | 12,967            | 31.66                                  |
| ≥85       | 94,736                               | 9,479             | 100.06                                 | 271,873                              | 5,886             | 21.65                                  |

**Supplementary Table 4.** Akaike information criterion for the association between daily medical care utilization for urolithiasis and selected meteorological factors and ambient air pollutants (MFAPs)

| Test | MFAP as effect                                                                                                                                                                                                           | DF | AIC   |
|------|--------------------------------------------------------------------------------------------------------------------------------------------------------------------------------------------------------------------------|----|-------|
| 1    | Average Temperature, Diurnal Temperature Range, Dew point<br>Temperature, Humidity, Sunshine Duration, Solar Radiation, PM <sub>2.5</sub> ,<br>PM <sub>10</sub> , CO, NO <sub>2</sub> , SO <sub>2</sub> , O <sub>3</sub> | 12 | 44.63 |
| 2    | Average Temperature, Diurnal Temperature Range, Dew point<br>Temperature, Humidity, Sunshine Duration, Solar Radiation, PM <sub>2.5</sub> ,<br>PM <sub>10</sub> , CO, NO <sub>2</sub> , SO <sub>2</sub>                  | 11 | 38.53 |
| 3    | Average Temperature, Diurnal Temperature Range, Dew point<br>Temperature, Humidity, Sunshine Duration, Solar Radiation, PM <sub>2.5</sub> ,<br>PM <sub>10</sub> , CO, NO <sub>2</sub>                                    | 10 | 35.73 |
| 4    | Average Temperature, Diurnal Temperature Range, Dew point<br>Temperature, Humidity, Sunshine Duration, Solar Radiation, PM <sub>2.5</sub> ,<br>PM <sub>10</sub> , CO                                                     | 9  | 28.17 |
| 5    | Average Temperature, Diurnal Temperature Range, Dew point                                                                                                                                                                | 8  | 33.00 |

|           |                                                                                                                                                |          |             |
|-----------|------------------------------------------------------------------------------------------------------------------------------------------------|----------|-------------|
|           | Temperature, Humidity, Sunshine Duration, Solar Radiation, PM <sub>2.5</sub> , PM <sub>10</sub>                                                |          |             |
| 6         | Average Temperature, Diurnal Temperature Range, Dew point<br>Temperature, Humidity, Sunshine Duration, Solar Radiation, PM <sub>2.5</sub>      | 7        | 22.77       |
| 7         | Average Temperature, Diurnal Temperature Range, Dew point<br>Temperature, Humidity, Sunshine Duration, Solar Radiation, PM <sub>2.5</sub> , CO | 8        | 18.13       |
| 8         | Average Temperature, Diurnal Temperature Range, Dew point<br>Temperature, Humidity, Sunshine Duration, PM <sub>2.5</sub> , CO                  | 7        | 12.18       |
| 9         | Average Temperature, Diurnal Temperature Range, Dew point<br>Temperature, Sunshine Duration, PM <sub>2.5</sub> , CO                            | 6        | 8.56        |
| <b>10</b> | <b>Average Temperature, Diurnal Temperature Range, Sunshine<br/>Duration, PM<sub>2.5</sub>, CO</b>                                             | <b>5</b> | <b>4.89</b> |
| 11        | Average Temperature, Diurnal Temperature Range, Sunshine<br>Duration, PM <sub>2.5</sub> , PM <sub>10</sub>                                     | 5        | 19.67       |



|    |                                                                                                           |   |       |
|----|-----------------------------------------------------------------------------------------------------------|---|-------|
| 12 | Average Temperature, Diurnal Temperature Range, Sunshine<br>Duration, PM <sub>2.5</sub> , SO <sub>2</sub> | 5 | 12.65 |
| 13 | Average Temperature, Diurnal Temperature Range, Sunshine<br>Duration, PM <sub>2.5</sub> , NO <sub>2</sub> | 5 | 17.47 |
| 14 | Average Temperature, Diurnal Temperature Range, Sunshine<br>Duration, PM <sub>2.5</sub> , O <sub>3</sub>  | 5 | 15.90 |

---

MFAPs, meteorological factors and ambient air pollutants; DF, degree of freedom ; AIC, Akaike Information Criterion ; PM<sub>2.5</sub>, particulate matter  $\leq 2.5 \mu\text{m}$ ; PM<sub>10</sub>, PM  $\leq 10 \mu\text{m}$  in diameter; CO, carbon monoxide; NO<sub>2</sub>, Nitrogen Dioxide; SO<sub>2</sub>, Sulfur Dioxide; O<sub>3</sub>, Ozone

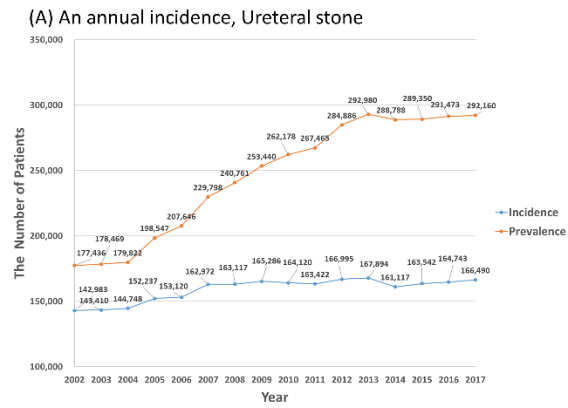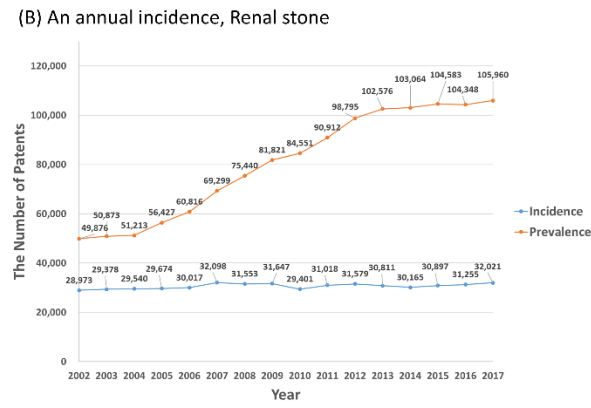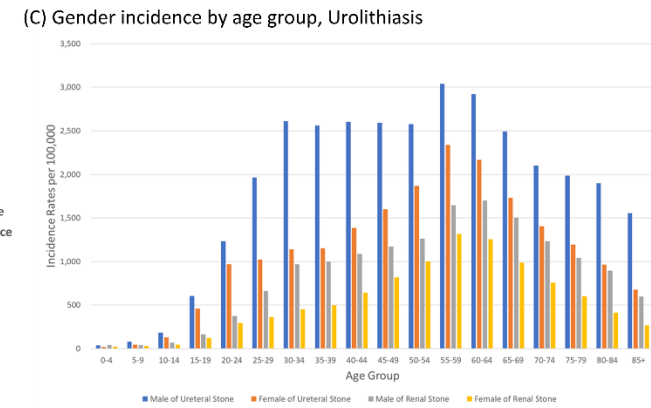

**Supplementary Figure 1.** Prevalence and incidence of (a) ureteral and (b) renal stones between 2002 and 2017. (c) Histogram of the sex-dependent incidence of urolithiasis according to age group.

### Ureteral stone

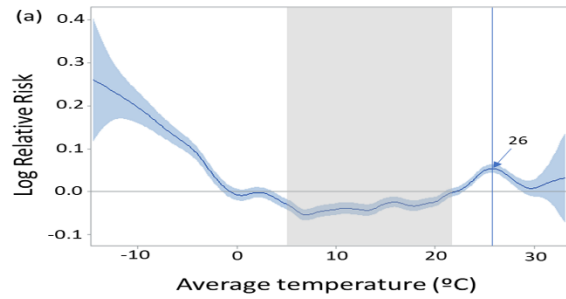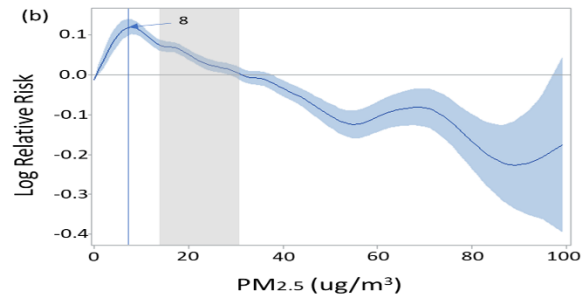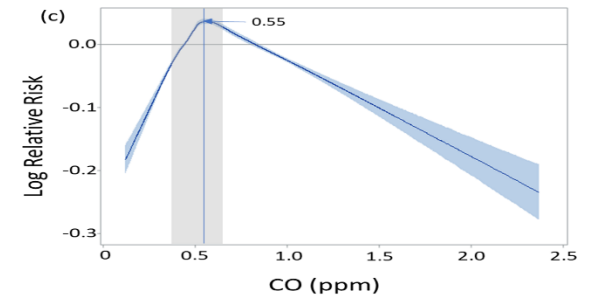

### Renal stone

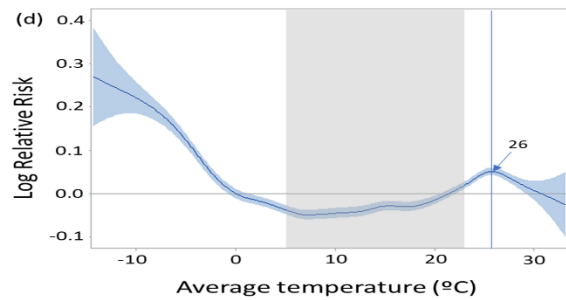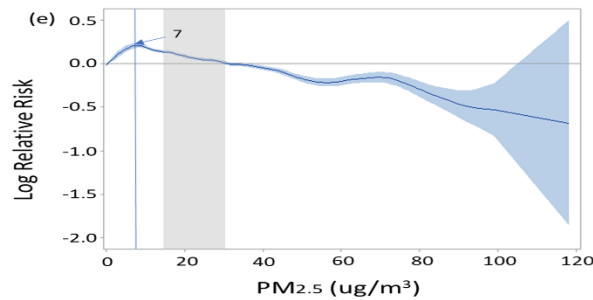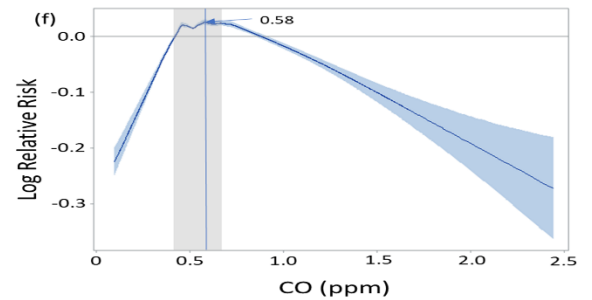

### Supplementary Figure 2

Generalized additive model with natural splines for the effect of selected MFAPs on the number of medical care utilization for urolithiasis. Ureteral stones: (a) average temperature, (b) PM<sub>2.5</sub>, and (c) CO. Renal stones: (d) average temperature, (e) PM<sub>2.5</sub>, and (f) CO. The bold line indicates the relative effect sizes for urolithiasis, and the blue area indicates 95% confidence intervals. The X- and Y-axes represent the selected MFAPs and relative effect sizes for urolithiasis, respectively. MFAPs, meteorological factors and ambient air pollutants; PM<sub>2.5</sub>, particulate matter  $\leq 2.5$   $\mu\text{m}$ ; CO, carbon monoxide.
